# Supplementary material
Source: Royal Society of Chemistry journal article supplement (doi:10.1039/d6ta01453d)
Supplement: d6ta01453d1.pdf [file d6ta01453d1.pdf]

## Supporting Information

### 1 Ionically Engineered Zn@Fe<sub>3</sub>O<sub>4</sub> Nanocomposite Hydrogels with Stretchable Mechanics 2 and High-Performance Electrochemical Storage for Wearable Supercapacitors and 3 Strain Sensors

4 Azaz Ali Khan<sup>1</sup>, Ibrar Ahmad<sup>1</sup>, Daixin Ye<sup>2</sup>, Luqman Ali Shah<sup>1,2\*</sup>

5 <sup>1</sup>*Polymer Laboratory, National Centre of Excellence in Physical Chemistry, University of*  
6 *Peshawar, Peshawar 25120 Pakistan*

7 <sup>2</sup>*Institute for Sustainable Energy, College for Sciences, Shanghai University, Shanghai,*  
8 *200444, China*

9 \*Corresponding author

10 **Email:** [luqman\\_alisha@uop.edu.pk](mailto:luqman_alisha@uop.edu.pk)

11 **Tel:** (9291)9216766

### 12 S1. Experimental Section

#### 13 S1.1 Materials for Composite NPs

14 Chemical co-precipitation technique was used to synthesize composite Zn-doped-  
15 magnetite NPs (Zn@Fe<sub>3</sub>O<sub>4</sub>). In this work, ≥99.0% (RT), puriss. p.a. Ferrous Chloride  
16 tetrahydrate (FeCl<sub>2</sub>·4H<sub>2</sub>O, 13478-10-9), ACS reagent, crystallized, 98.0-102% (RT) Ferric  
17 Chloride hexahydrate (FeCl<sub>3</sub>·6H<sub>2</sub>O, 10025-77-1), DEAJUNG reagent, 98% Zinc nitrate  
18 hexahydrate (Zn(NO<sub>3</sub>)<sub>2</sub>·6H<sub>2</sub>O, 10196-18-6), 97-100.5% Sodium hydroxide (NaOH, 1310-73-  
19 2), ≥99.8%, ACS reagent, ethyl alcohol (C<sub>2</sub>H<sub>6</sub>O, 64-17-5), and Milli-Q double deionized water  
20 was used. All the reagents were of analytical grade and used without any further treatment.

#### 21 S1.2 Synthesis of Zn-doped Fe<sub>3</sub>O<sub>4</sub> NPs

## Supporting Information

22 Zn-doped magnetite ( $Zn_xFe_{3-x}O_4$ , where  $x \approx 0.1$ ) nanoparticles (NPs) were synthesized  
23 via a chemical co-precipitation method. Initially, stoichiometric amounts of ferric chloride  
24 hexahydrate ( $FeCl_3 \cdot 6H_2O$ , 2.22 g) and ferrous chloride tetrahydrate ( $FeCl_2 \cdot 4H_2O$ , 0.77 g) were  
25 dissolved in distilled water, maintaining a  $Fe^{3+}$  to  $Fe^{2+}$  molar ratio of 2:0.9. The solution was  
26 stirred vigorously at 80 °C for 2 hours. To achieve approximately 3.5 mol% Zn doping  
27 (targeting  $x \approx 0.1$  in  $Zn_xFe_{3-x}O_4$ ), an aqueous solution of a zinc salt was added dropwise to the  
28 iron precursor under continuous stirring to ensure uniform distribution of  $Zn^{2+}$  ions.  
29 Subsequently, a 2.0 M NaOH solution was slowly introduced until the pH reached ~13,  
30 promoting the co-precipitation of the Zn-doped  $Fe_3O_4$  NPs. The resulting black precipitate was  
31 separated using a magnet, centrifuged at 9000 rpm for 30 minutes, and washed repeatedly with  
32 distilled water and ethanol until the pH decreased to ~6.5. Finally, the product was dried in a  
33 vacuum oven at 400 °C for 4 hours and ground into fine nano-powder[1].

## 34 S2. Results and Discussion

### 35 S2.1 Characterization of pure $Zn_xFe_{3-x}O_4$ NPs

## Supporting Information

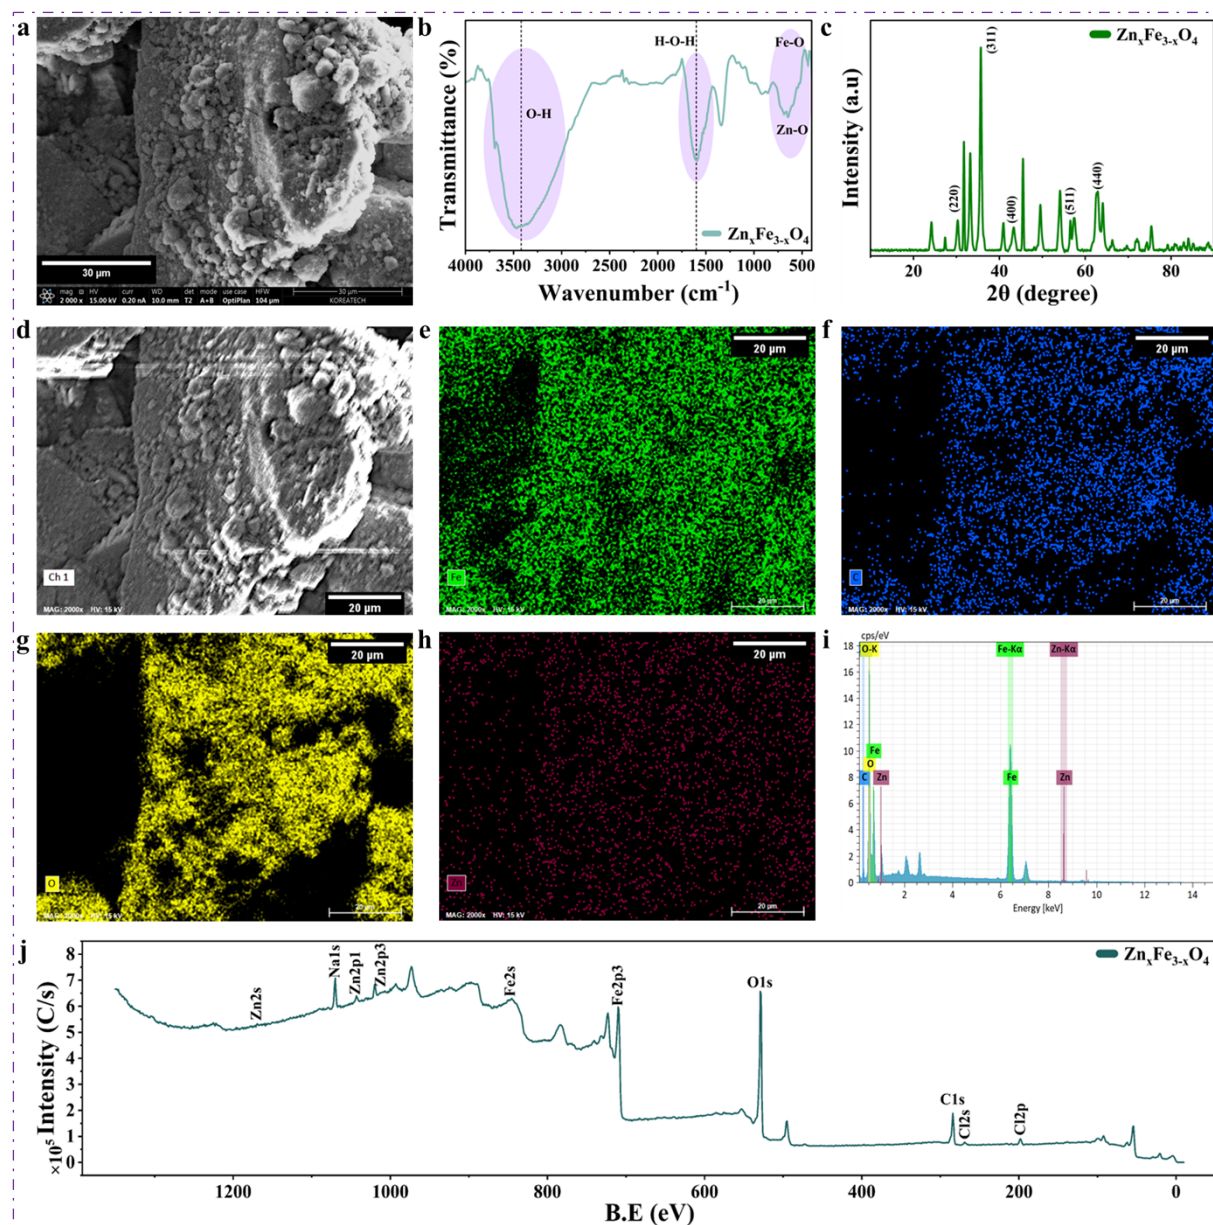

36

37 **Figure S1.** (a) SEM image showing the morphology of Zn-doped Fe<sub>3</sub>O<sub>4</sub> nanoparticles (NPs)  
 38 at a scale of 30 μm. (b) FTIR spectrum of Zn-doped Fe<sub>3</sub>O<sub>4</sub> NPs highlighting the characteristic  
 39 functional groups. (c) XRD pattern confirming the crystalline structure of Zn-doped Fe<sub>3</sub>O<sub>4</sub> NPs.  
 40 (d–i) EDS elemental analysis illustrating the composition and confirming the presence of Zn,  
 41 Fe, and O in the NPs. (j) High-resolution XPS spectra of Zn<sub>x</sub>Fe<sub>3-x</sub>O<sub>4</sub> NPs showing the  
 42 characteristic peaks of Fe, Zn, and O, confirming their incorporation within the spinel oxide  
 43 structure.

## Supporting Information

44 The surface morphology of the  $Zn_xFe_{3-x}O_4$  nanoparticles (NPs) was characterized using  
45 field emission scanning electron microscopy (FE-SEM), as presented in Figure S1a. The  
46 images show that the NPs possess a generally spherical shape with noticeable agglomeration  
47 an expected behavior for spinel ferrite NPs, primarily due to their magnetic interactions and  
48 elevated surface energy. The average particle size was estimated to range between 30 and 60  
49 nm, indicating effective nano-structuring achieved through the employed synthesis approach.  
50 FTIR spectroscopy was also performed on the synthesized  $Zn_xFe_{3-x}O_4$  NPs to verify the  
51 formation of the spinel structure. As illustrated in Figure S1b, a broad absorption band around  
52  $3420\text{ cm}^{-1}$  corresponds to O–H stretching vibrations from surface hydroxyl groups and  
53 adsorbed moisture, while a prominent peak at approximately  $1600\text{ cm}^{-1}$  is attributed to H–O–H  
54 bending of physically adsorbed water. The most distinctive signals appear in the  $600\text{--}400\text{ cm}^{-1}$   
55  $^{-1}$  region, where absorption bands near  $580\text{ cm}^{-1}$  and  $470\text{ cm}^{-1}$  are associated with Fe–O and Zn–  
56 O stretching vibrations in the tetrahedral and octahedral sites of the spinel lattice. These  
57 features align closely with reported values for  $Zn_xFe_{3-x}O_4$ , confirming the successful formation  
58 of the ferrite phase. The close correspondence with reference spectra further validates the phase  
59 purity and structural fidelity of the synthesized NPs[1]. The crystalline structure of the  
60 synthesized  $Zn_xFe_{3-x}O_4$  NPs was confirmed by X-ray diffraction (XRD) analysis, as shown in  
61 Figure S1c. The diffraction pattern exhibited distinct peaks at  $2\theta$  values of approximately  $30.1^\circ$ ,  
62  $35.4^\circ$ ,  $43.1^\circ$ ,  $56.9^\circ$ , and  $62.5^\circ$ , which correspond to the (220), (311), (400), (511), and (440)  
63 planes of the spinel  $Zn_xFe_{3-x}O_4$  structure, respectively. These peaks are in good agreement with  
64 the standard Joint Committee on Powder Diffraction Standards (JCPDS) card No. 22-1012,  
65 confirming the formation of a well-defined spinel phase[1]. The absence of impurity peaks  
66 further indicates the high purity and phase integrity of the synthesized NPs[2]. The elemental  
67 composition of  $Zn_xFe_{3-x}O_4$  NPs was confirmed by energy-dispersive X-ray spectroscopy  
68 (EDS), as shown in Figure S2(d–i). The EDS spectrum exhibits distinct peaks corresponding

## Supporting Information

69 to Zn, Fe, and O, with no detectable impurities, confirming the successful and high-purity  
70 synthesis of  $Zn_xFe_{3-x}O_4$ . Moreover, the elemental ratios are in close agreement with the  
71 expected stoichiometry of Zn:Fe:O for the spinel  $Zn_xFe_{3-x}O_4$  structure. The corresponding  
72 elemental compositions are summarized in Table S1. The X-ray photoelectron survey spectrum  
73 of  $Zn_xFe_{3-x}O_4$  NPs displays the characteristic signals of Fe, Zn, and O, confirming their  
74 presence in the oxide framework. A weak carbon contribution is also detected, which can be  
75 attributed to minor surface contamination from air exposure. The elemental composition  
76 obtained from the survey indicates that Zn is successfully incorporated into the magnetite  
77 lattice without forming any separate zinc oxide phases. The absence of additional peaks further  
78 supports the chemical purity and uniformity of the prepared NPs, reflecting a stable spinel-type  
79 structure (Fig S2j)[3, 4].

80

81 **Table S1** presents the elemental composition of  $Zn_xFe_{3-x}O_4$  NPs, confirming the successful  
82 incorporation of Zn into the ferrite structure.

| Elements | At. No. | Mass (%)     | Mass Norm. (%) | Atom (%)      | Abs.error (%) |
|----------|---------|--------------|----------------|---------------|---------------|
| C        | 6       | 3.16         | 3.65           | 9.96          | 1.65          |
| O        | 8       | 19.96        | 23.07          | 47.23         | 6.99          |
| Fe       | 26      | 61.73        | 71.34          | 41.84         | 5.52          |
| Zn       | 30      | 1.68         | 1.94           | 0.97          | 0.33          |
|          |         | <b>86.52</b> | <b>100.00</b>  | <b>100.00</b> |               |

83

84

85

## Supporting Information

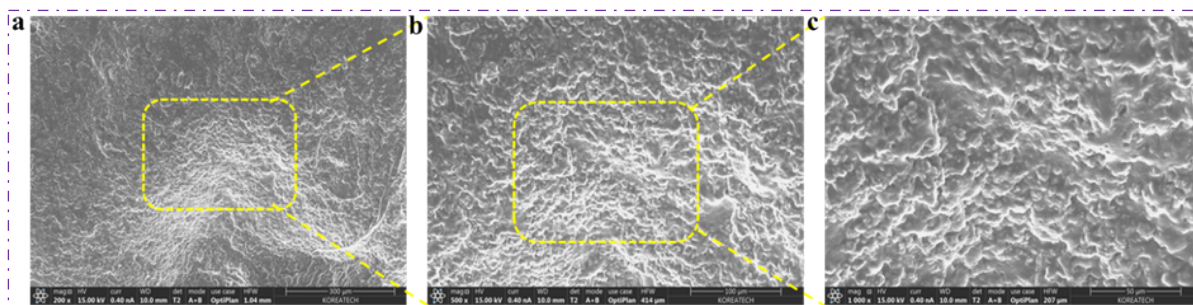

86  
87 **Figure S2.** Surface morphology of the ZnF<sub>1.50%</sub> n-CH.

88

89

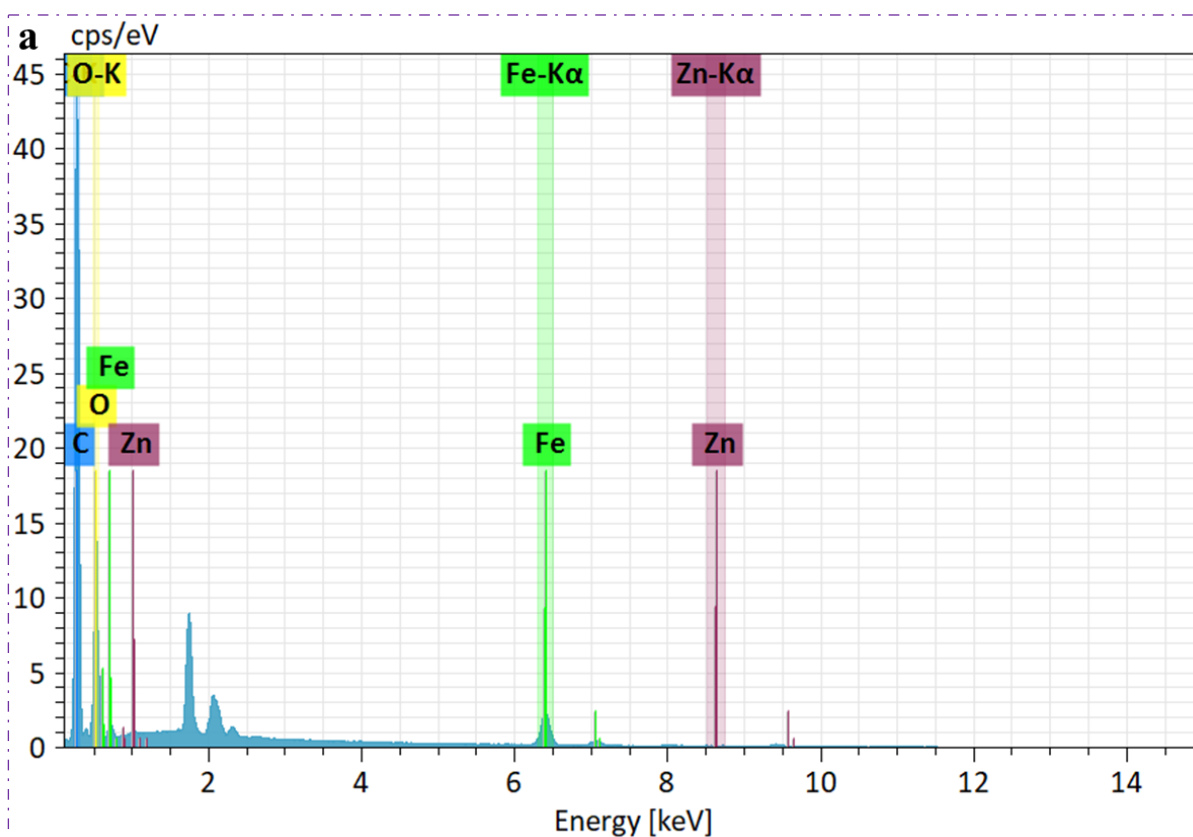

90  
91 **Figure S3** EDS elemental analysis of the ZnF<sub>1.00%</sub> n-CH. The spectra and corresponding  
92 elemental maps confirm the presence and uniform distribution of Zn, Fe, and O throughout the  
93 hydrogel matrix.

94 **Table S2** summarizes the elemental composition of the ZnF<sub>1.00%</sub> n-CH determined from EDS  
95 analysis.

## Supporting Information

| Elements | At. No. | Mass (%)     | Mass Norm. (%) | Atom (%)      | Abs.error (%) |
|----------|---------|--------------|----------------|---------------|---------------|
| C        | 6       | 36.30        | 56.57          | 68.42         | 12.00         |
| O        | 8       | 20.13        | 31.37          | 28.48         | 7.06          |
| Fe       | 26      | 7.21         | 11.24          | 2.92          | 0.73          |
| Zn       | 30      | 0.52         | 0.81           | 0.18          | 0.16          |
|          |         | <b>64.16</b> | <b>100.00</b>  | <b>100.00</b> |               |

96

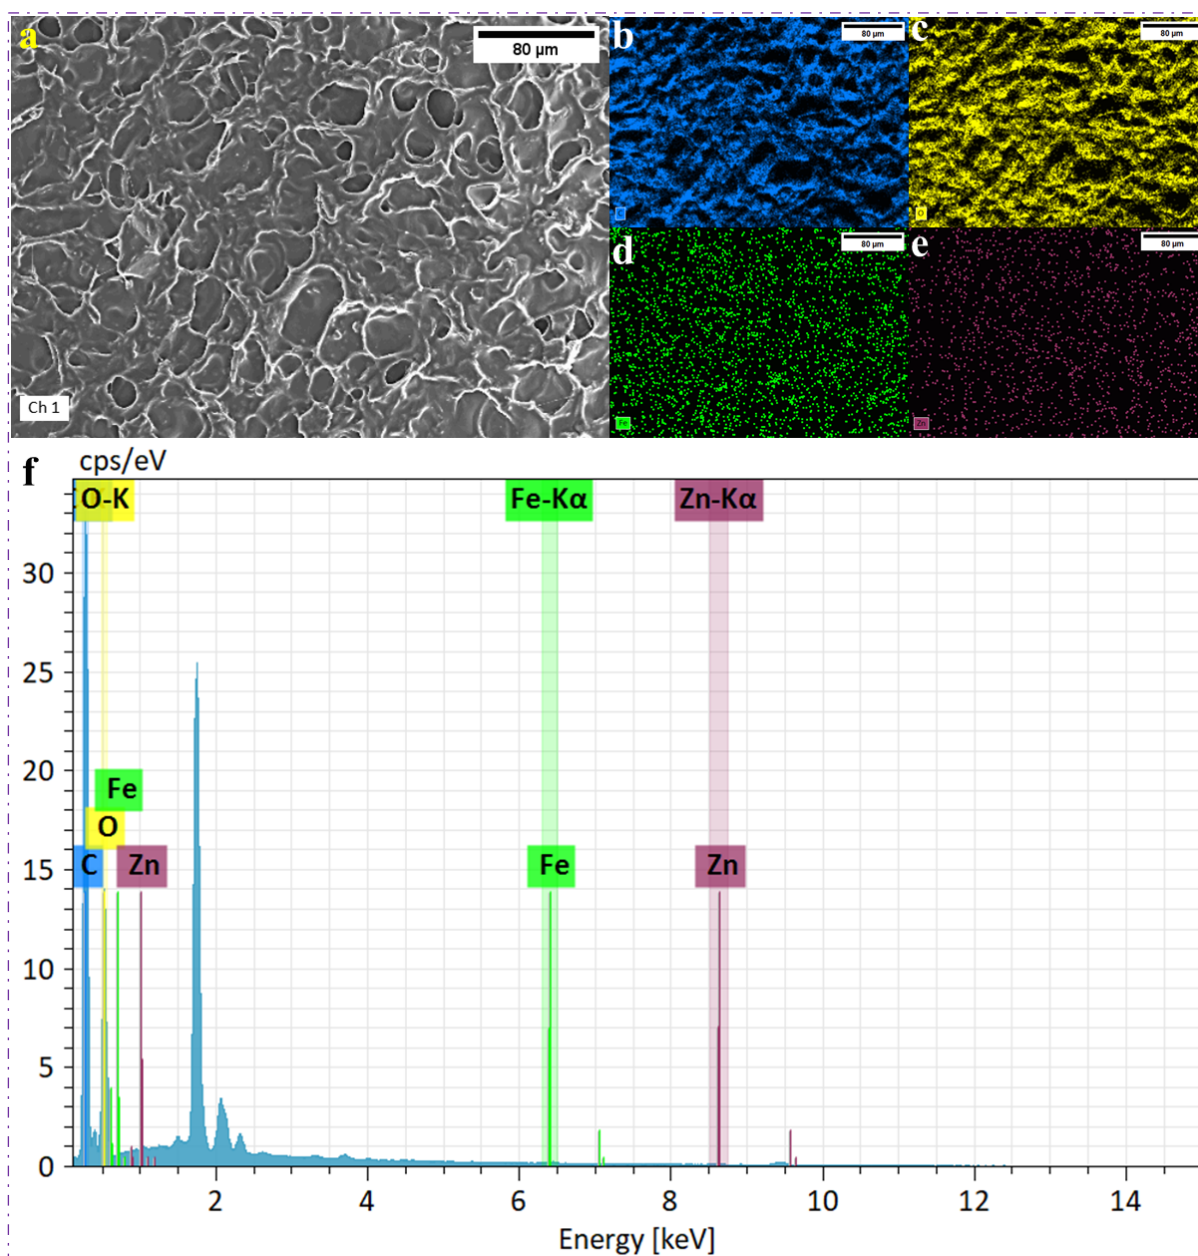

97

98 **Figure S4. (a-f)** Elemental mapping of pristine hydrogel (PH)  $\text{ZnF}_{0.00\%}$  with respect to Fe, Zn,

99 O and C.

## Supporting Information

100 **Table S3** summarizes the elemental composition of the ZnF<sub>0.00%</sub> PH determined from EDS  
101 analysis.

| Elements | At. No. | Mass (%)     | Mass Norm. (%) | Atom (%)      | Abs.error (%) |
|----------|---------|--------------|----------------|---------------|---------------|
| C        | 6       | 55.70        | 55.70          | 62.96         | 18.62         |
| O        | 8       | 43.40        | 43.40          | 36.83         | 15.19         |
| Fe       | 26      | 0.59         | 0.59           | 0.14          | 0.16          |
| Zn       | 30      | 0.31         | 0.31           | 0.07          | 0.16          |
|          |         | <b>100.0</b> | <b>100.00</b>  | <b>100.00</b> |               |

102

103

104 **Table S4** presents the electrochemical equivalent circuit fitting results for the ZnF<sub>x%</sub> n-CHs.

|                    | ZnF <sub>0.25%</sub>    | ZnF <sub>0.50%</sub>    | ZnF <sub>1.00%</sub>    | ZnF <sub>1.50%</sub>    |
|--------------------|-------------------------|-------------------------|-------------------------|-------------------------|
| Elements           | Value                   | Value                   | Value                   | Value                   |
| Rs                 | 6.42 Ω cm <sup>2</sup>  | 3.051 Ω cm <sup>2</sup> | 2.463 Ω cm <sup>2</sup> | 8.854 Ω cm <sup>2</sup> |
| Cdl-T              | 6.94E-04                | 2.36E-03                | 9.89E-04                | 6.814E-03               |
| Cdl-P              | 0.56832                 | 0.52868                 | 0.63249                 | 0.5066                  |
| Rct                | 5.481 Ω cm <sup>2</sup> | 9.669 Ω cm <sup>2</sup> | 4.225 Ω cm <sup>2</sup> | 22.42 Ω cm <sup>2</sup> |
| w-T                | 9.86E-03                | 7.41E-03                | 1.15E-02                | 1.26E-03                |
| w-P                | 0.501                   | 0.736                   | 0.704                   | 0.842                   |
| <b>Chi-Squared</b> | 8.74E-06                | 1.934E-04               | 3.795E-04               | 5.8301E-05              |

105

106

107

108

109

## Supporting Information

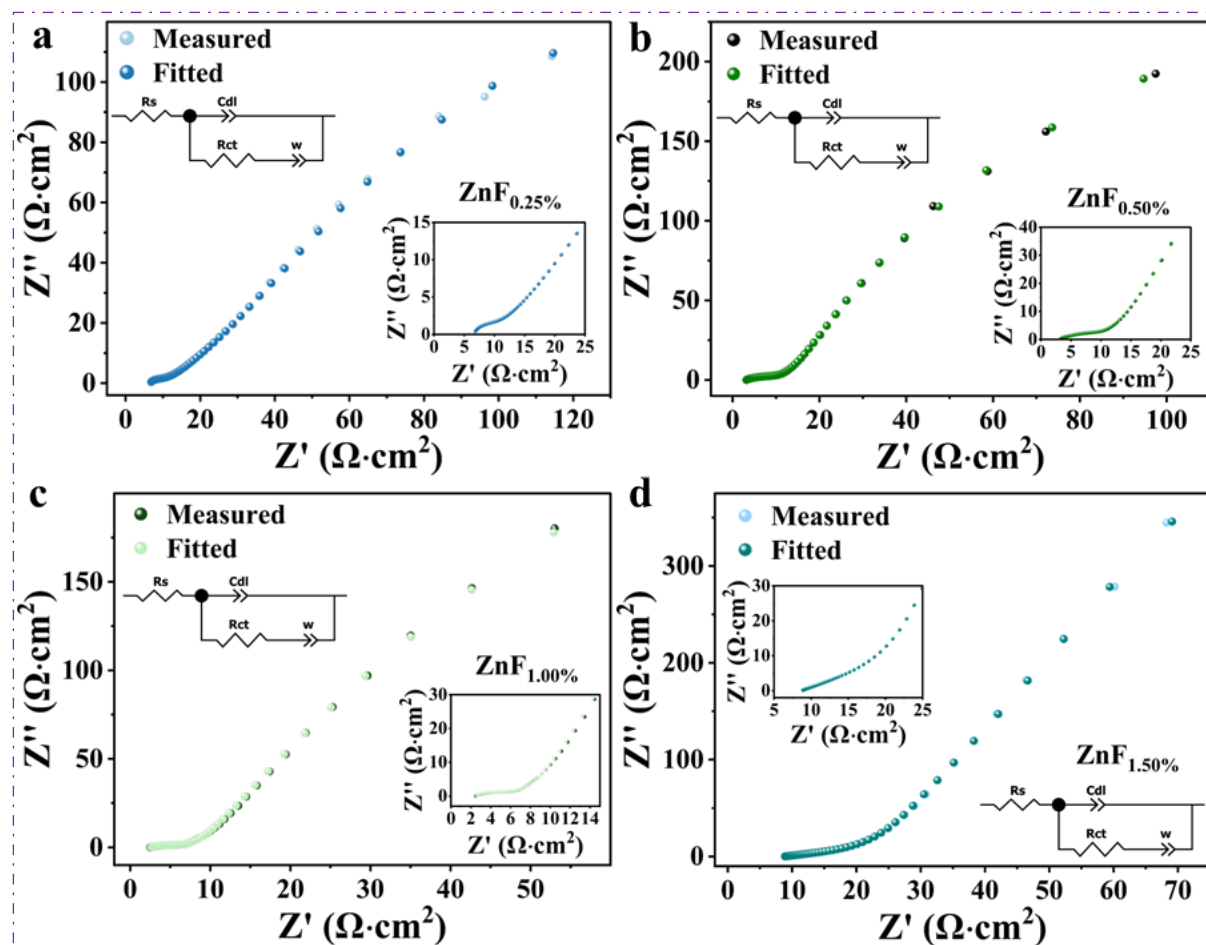

110

111 **Figure S5.** Electrochemical characterization of  $\text{ZnF}_{x\%}$  n-CHs. (a–d) Nyquist plots with

112 equivalent circuit fittings for all compositions.

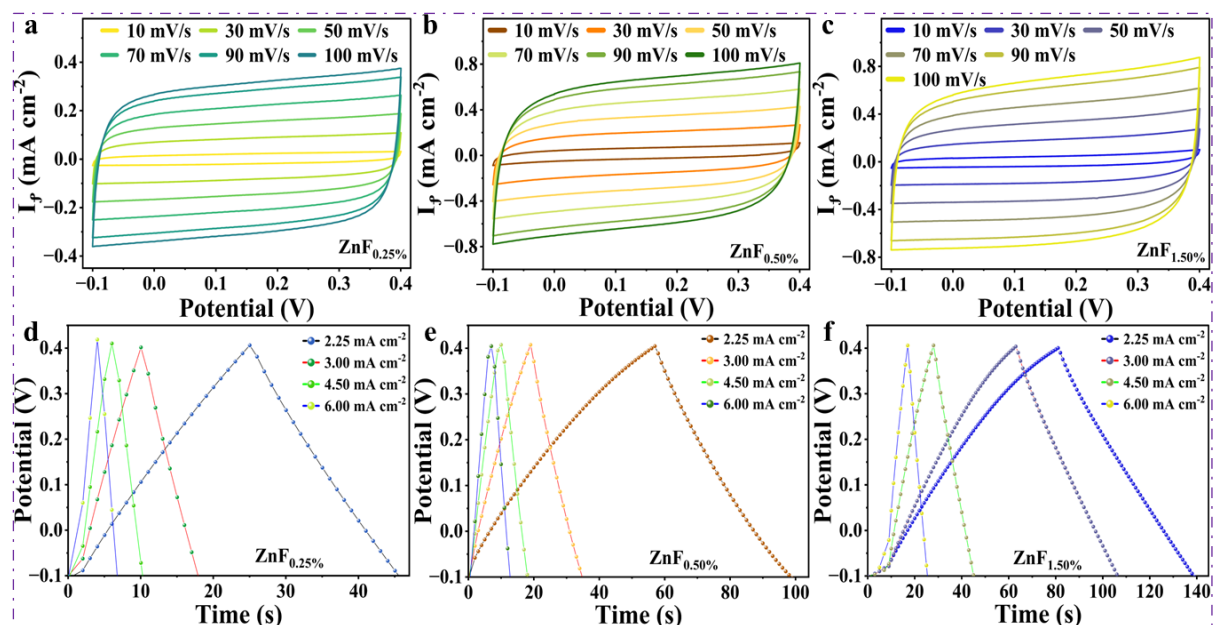

113

114 **Figure S6.** (a–c) CV curves of  $\text{ZnF}_{x\%}$  n-CHs ( $\text{ZnF}_{0.25\%}$ ,  $\text{ZnF}_{0.50\%}$  and  $\text{ZnF}_{1.50\%}$ ) recorded at scan rates of

## Supporting Information

115 10 to 100 mV/s, while (d-f) GCD profiles of ZnF<sub>0.25%</sub>, 0.50% and 1.50% at different current densities,  
 116 respectively.

117

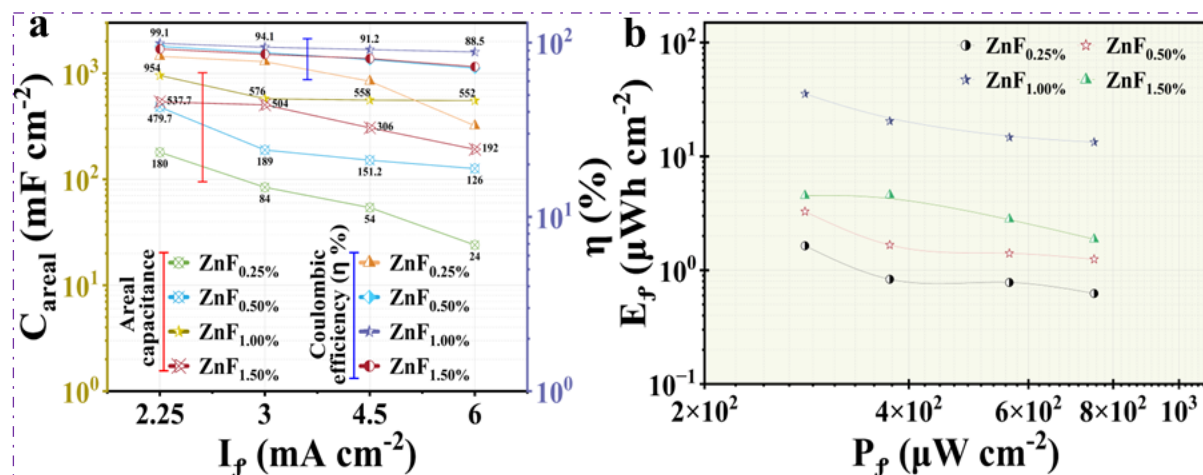

118

119 **Figure S7. (a)** Ragone plot of areal capacitance ( $C_{\text{areal}}$ ) and CE ( $\eta$ %) variation at various current  
 120 densities of ZnF<sub>x%</sub> n-CHs. **(b)** Ragone plot of  $P_f$  vs  $E_f$  of ZnF<sub>x%</sub> n-CH-based SCs.

121

122 **Table S5** Comparison of areal capacitance, energy density and power density of current work  
 123 with previously reported composite SCs.

## Supporting Information

| SC-Materials                                                                                           | Areal Capacitance<br>mF cm <sup>-1</sup> | Energy density<br>μWh cm <sup>-2</sup> | Power density<br>μW cm <sup>-2</sup> | Ref's               |
|--------------------------------------------------------------------------------------------------------|------------------------------------------|----------------------------------------|--------------------------------------|---------------------|
| PANI/PVA/H2SO4                                                                                         | 504                                      | 35                                     | 100                                  | [45]                |
| poly(2-acrylamido-2-methylpropane sulfonic acid (PAMPS)/PAM-LiCl/EG-PCSCs                              | 202.2                                    | 17.9                                   | 100                                  | [14]                |
| LIG-MWCNTs                                                                                             | 51.975                                   | 6.5                                    | 219                                  | [36]                |
| ACFM-850/TS carboxymethyl cellulose/NaClO4 composite                                                   | 888                                      | 9.2                                    | 130                                  | [50]                |
| p(3, 4-ethylenedioxythiophene)-poly (vinyl alcohol)/poly (ethylene glycol diacrylate), PEDOT-PVA/PEGDA | 54.5                                     | 4.7                                    | 260                                  | [37]                |
| Mo <sub>2</sub> C/MoO <sub>3</sub> /PVA/H <sub>2</sub> SO <sub>4</sub>                                 | -                                        | 42.93                                  | 520                                  | [26]                |
| VO <sub>2</sub> /Au                                                                                    | 18                                       | 0.45                                   | 70                                   | [16]                |
| Zn@Fe <sub>3</sub> O <sub>4</sub> /p(AAm-co-LMA)/IGEPAL®CA-630                                         | 954                                      | 36                                     | 281.3                                | <b>Current work</b> |
| Device: ZnF <sub>1.00%</sub>                                                                           | 525.4                                    | 146                                    | 2625                                 | *                   |

124

125

126

127

128

129

130

131

132

## Supporting Information

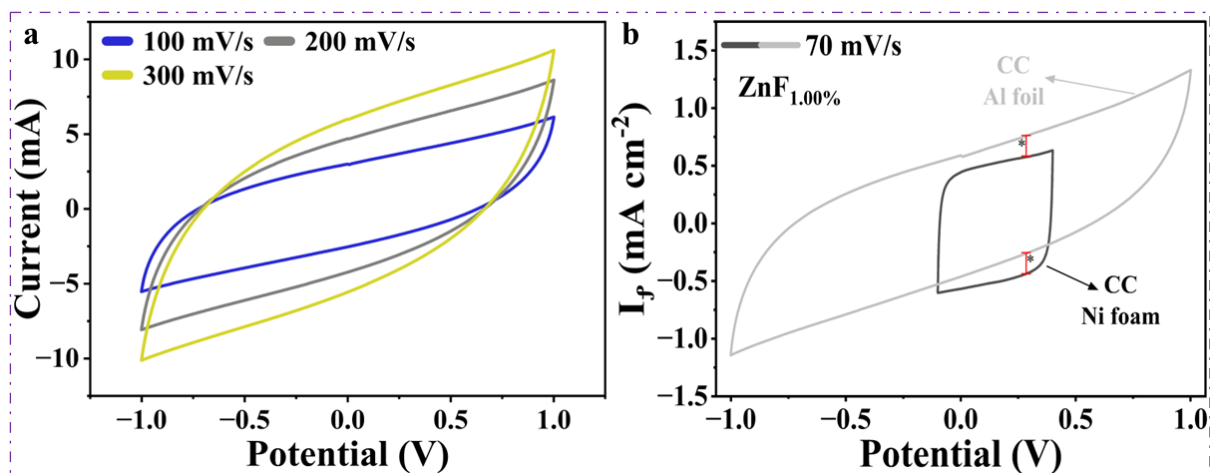

133

134 **Figure S8. (a)** CV curves at different scan rates (100–300 mV s<sup>-1</sup>) displaying typical EDLC  
135 behavior for soft packed supercapacitor ZnF<sub>1.00%</sub>. **(b)** CV profile of ZnF<sub>1.00%</sub> at 70 mV/s  
136 showing the area normalization ( $I_f$  [mA cm<sup>-2</sup>]) w.r.t different current collectors (CC).

137

138

## 139 References

- 140 1. Soltanpour, P., R. Naderali, and K. Mabhouti, *Comparative study on structural,*  
141 *morphological, and optical properties of MS/Fe<sub>3</sub>O<sub>4</sub> nanocomposites and M-doped*  
142 *Fe<sub>3</sub>O<sub>4</sub> nanopowders (M= Mn, Zn).* Scientific Reports, 2024. **14**(1): p. 21287.
- 143 2. Hayat, A., et al., *Potent antimicrobial and antibiofilm activity of citric acid coated*  
144 *magnetite nanoparticles for leather preservation.* Scientific Reports, 2025. **15**(1): p.  
145 27889.
- 146 3. Geng, J., et al., *Preparation of rGO@ Fe<sub>3</sub>O<sub>4</sub> nanocomposite and its application to*  
147 *enhance the thermal conductivity of epoxy resin.* RSC advances, 2021. **11**(27): p.  
148 16592-16599.
- 149 4. Qin, H., et al., *A multi-responsive healable supercapacitor.* Nature Communications,  
150 2021. **12**(1): p. 4297.
